# Supplementary material for: Crystal growth and characterization of a new polymorph of bismuth trithiourea chloride
Source: Royal Society of Chemistry journal article supplement (doi:10.1039/c3ce40121a), 2013-01-01
Supplement: c3ce40121a.pdf [file c3ce40121a.pdf]

## Supporting information

### Crystal Growth and Characterization of A New Polymorph of Bismuth Trithiourea Chloride

Ming Li<sup>a,b</sup> and R. K. Li<sup>a,\*</sup>

<sup>a</sup>Beijing Center for Crystal Research and Development, Key Laboratory of Functional Crystals and Laser Technology, Technical Institute of Physics and Chemistry, Chinese Academy of Sciences, Beijing 100190, China.

<sup>b</sup>Graduate University of Chinese Academy of Sciences, Beijing 100049, P. R. China.

The space groups of  $\alpha$ -BTC and  $\beta$ -BTC in the article are chosen as noncentrosymmetric in the structure analysis because of the following facts: for the  $\alpha$ -BTC, powder second harmonic generation (SHG) tests indicated its effective SHG coefficient to be 1/6 that of KDP. Meanwhile, reference 18 mentioned that  $\beta$ -BTC was noncentrosymmetric and exhibited NLO properties. When the anisotropic thermal factors of lighter elements (C-N) of both  $\alpha$ -BTC and  $\beta$ -BTC were refined, they went either too large or negative. Therefore we refined them isotropically and the H atoms were added to N by HFIX. The crystallographic data of  $\beta$ -BTC is shown in Table S1.

**Table S1.** Crystallographic data of  $\beta$ -BTC

|                            | $\beta$ -BTC                                                                   |
|----------------------------|--------------------------------------------------------------------------------|
| Formula                    | C <sub>3</sub> H <sub>12</sub> N <sub>6</sub> S <sub>3</sub> BiCl <sub>3</sub> |
| M                          | 543.70                                                                         |
| Temperature                | 299(2)K                                                                        |
| Crystal System             | Trigonal                                                                       |
| Space group                | <i>P</i> 3(#143)                                                               |
| <i>a</i> /Å                | 13.5930(11)                                                                    |
| <i>b</i> /Å                | 13.5930(11)                                                                    |
| <i>c</i> /Å                | 7.1406(11)                                                                     |
| $\beta$ /deg               | 90.00                                                                          |
| Cell volume/Å <sup>3</sup> | 1142.6(2)                                                                      |
| Z                          | 3                                                                              |
| Nref                       | 3491                                                                           |
| R1 (all data)              | 0.0672                                                                         |
| wR2 (all data)             | 0.0765                                                                         |

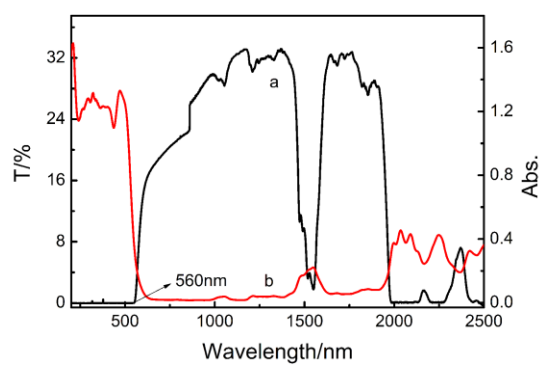

**Figure S1** The optical transmission(a) and diffuse reflection(b) spectra of  $\beta$ -BTC
